# Supplementary material for: A new supramolecular heterosynthon [C–I⋯OC(carboxylate)] at work: engineering copper acetate cocrystals
Source: Royal Society of Chemistry journal article supplement (doi:10.1039/d0ce01093f), 2020-01-01
Supplement: d0ce01093f1.pdf [file d0ce01093f1.pdf]

## New Supramolecular Heterosynthon [C-I...O=C(carboxylate)] at Work:

### Engineering of the Copper Acetates Cocrystals.

Yury V. Torubaev, Ivan V. Skabitsky

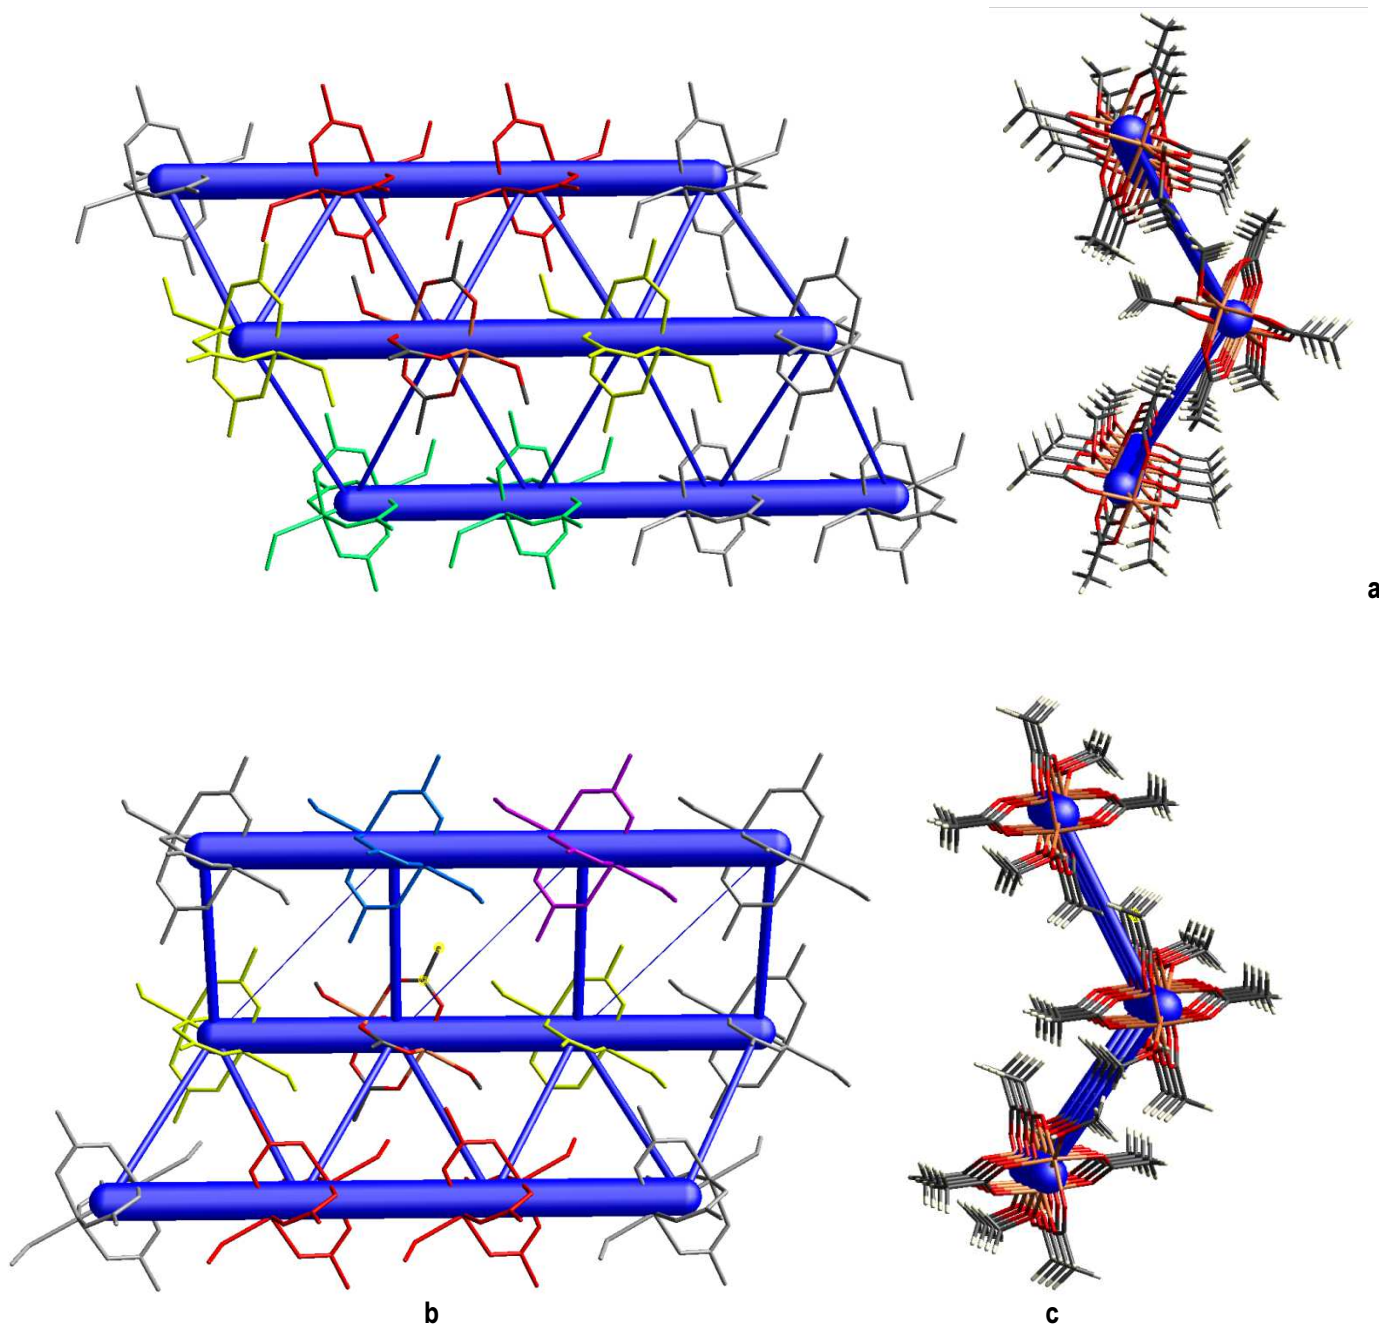

**Figure S1.** Showing the energy framework of the native crystal of  $[\text{Cu}(\text{OAc})_2\text{MeOH}]_2$  as the intersection of three planes (a, only half of each plane is shown for clarity), and its extended side projections (b) and (c). Intermolecular interactions are given in kJ/mol

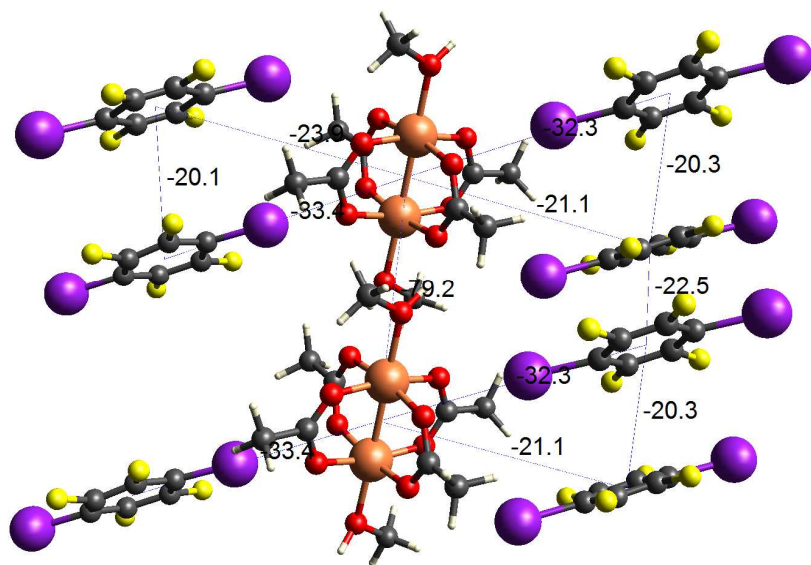

**Figure S2.** Showing the intermolecular interaction energies (in kJ/mol) in the fragment of cocrystal 2 packing,

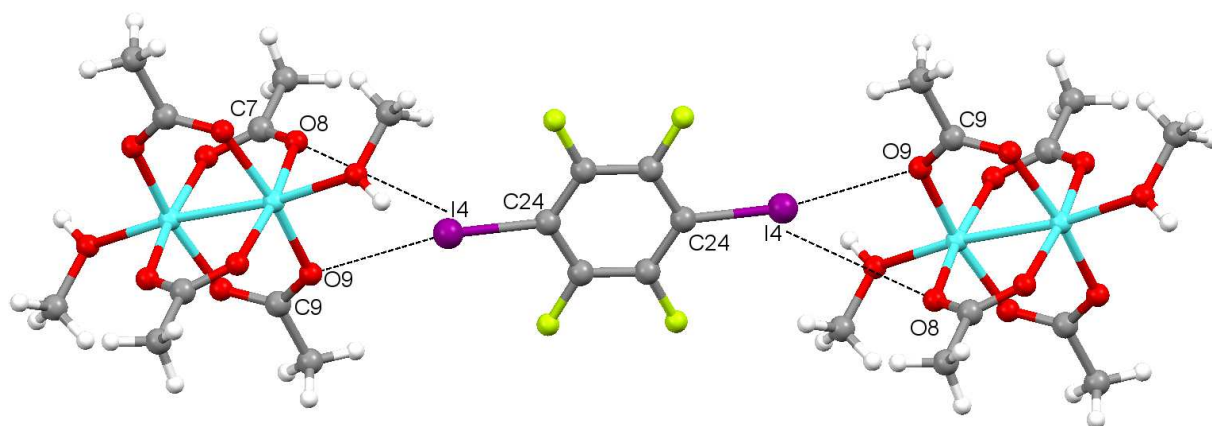

**(a)** Selected intermolecular distances (Å): O(8)-I(4) 3.46(1), I(4)-O(9) 3.090(4)

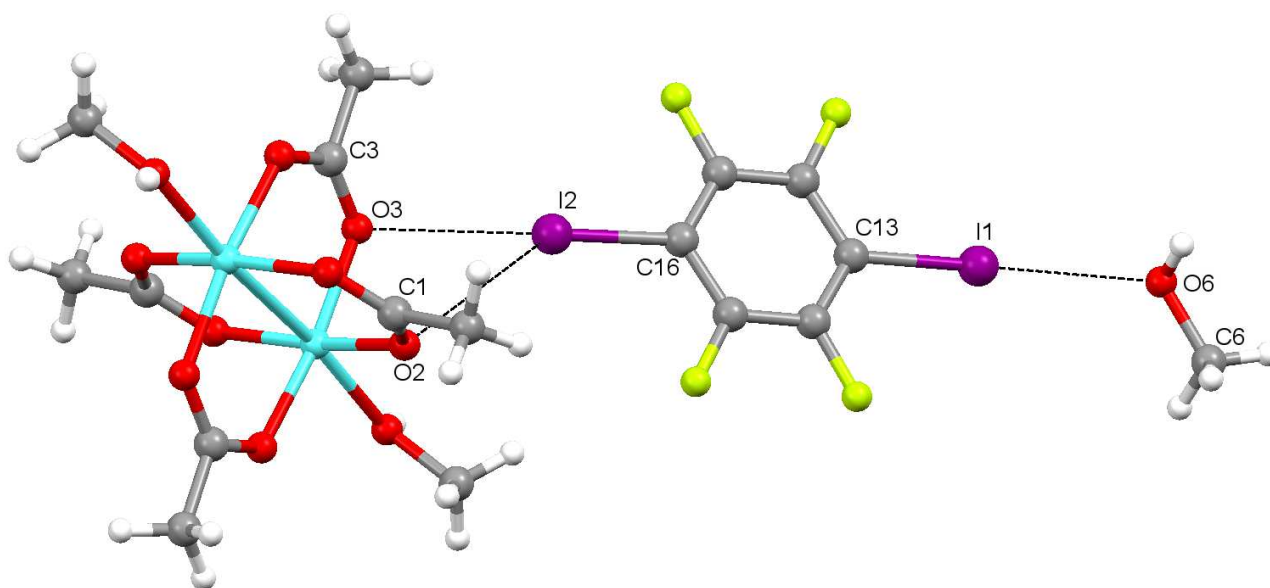

**(b)** Selected intermolecular distances (Å): O(3)-I(2) 3.032(3), I(2)-O(2) 3.748(3), I(1)-O(6) 2.917(3)

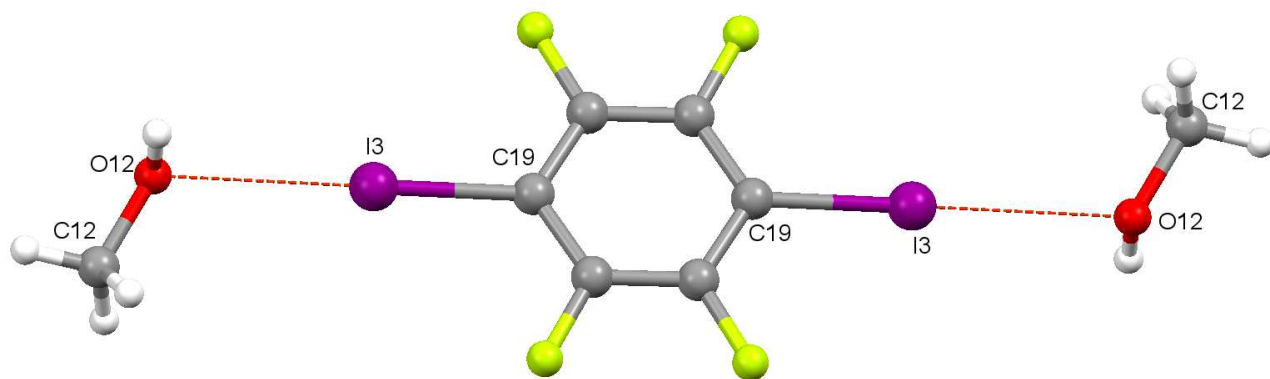

(c) Selected intermolecular distances (Å): I3---O12 2.911(3), C19-I3---O12 176.2(1), C12-O12—I3 120.0(3)

**Figure S3.** Fragments of crystal packing of **2**, showing three independent molecules of 1,4-DITFB bridging (a) two [Cu(OAc)<sub>2</sub>MeOH]<sub>2</sub> molecules, (b) [Cu(OAc)<sub>2</sub>MeOH]<sub>2</sub> molecule and MeOH solvate, and (c) two MeOH solvates.

|  | E_ele | E_pol | E_dis | E_rep | E_tot |
|--|-------|-------|-------|-------|-------|
|  | -22.0 | -3.5  | -19.6 | 11.7  | -35.6 |
|  | -37.1 | -9.0  | -21.6 | 44.3  | -37.3 |
|  | -58.0 | -13.4 | -16.0 | 67.4  | -43.5 |

**Figure S4.** Showing the intermolecular interaction energies in the ([Cu(OAc)<sub>2</sub>MeOH]<sub>2</sub> 2MeOH)<sub>n</sub> chain of cocrystal solvate **2**. Intermolecular interactions are given in kJ/mol. (CE-B3LYP / DGDZVP).



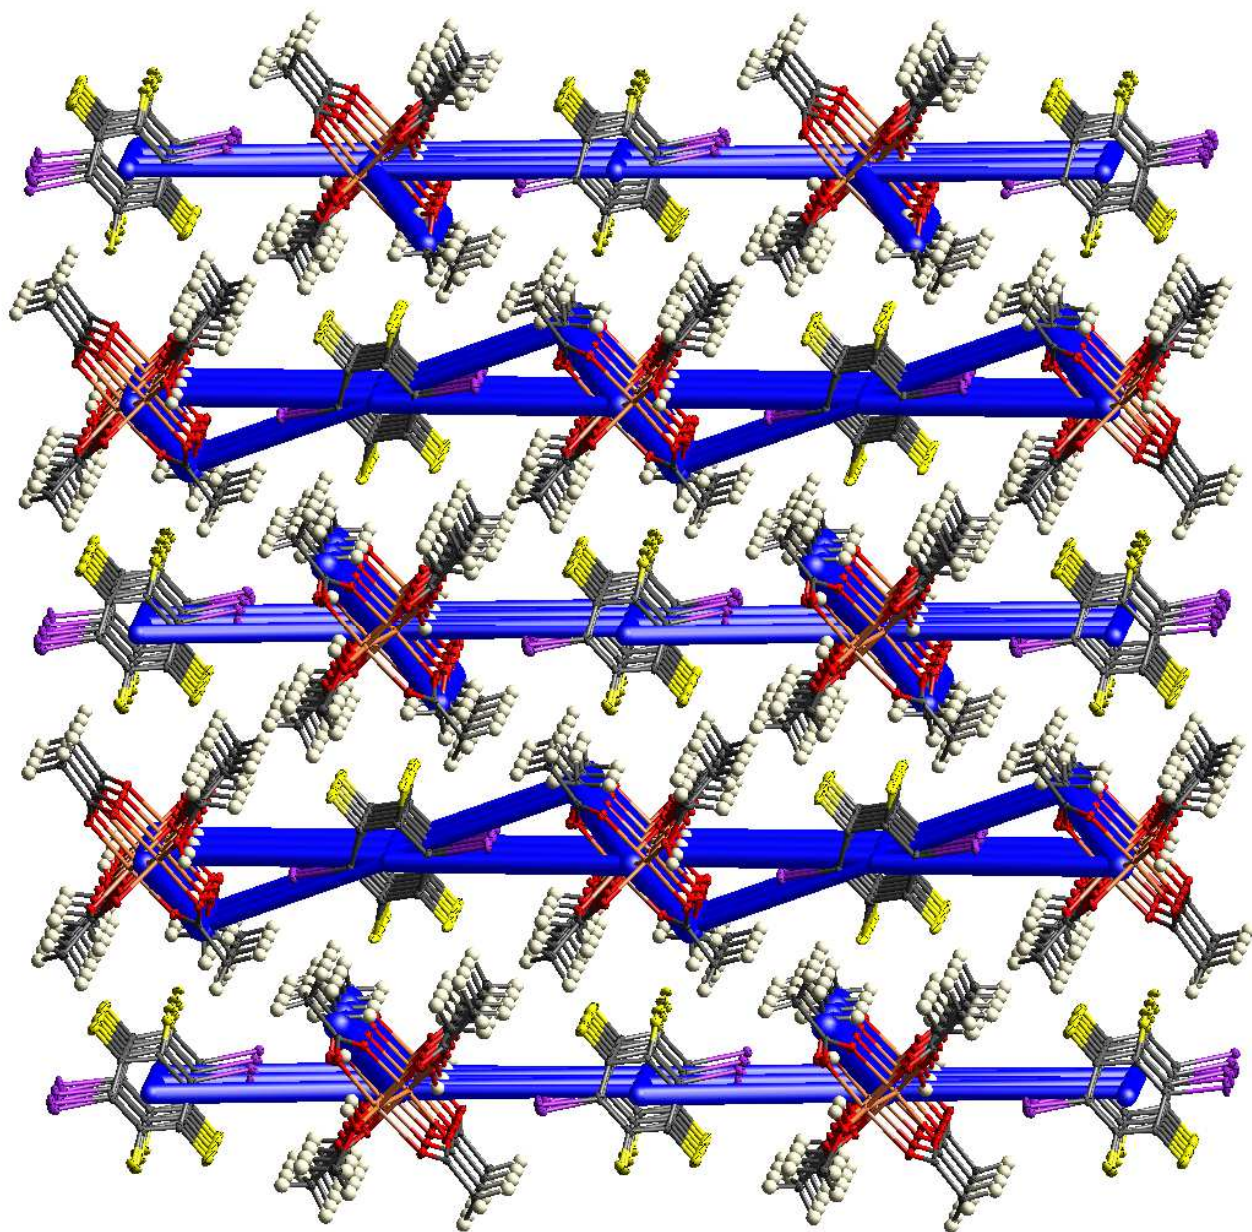

**Figure S5.** Showing the energy framework of **2** along the *c*-axis (cutoff 20 kJ/mol). Notice the absence of planar homomolecular energy frameworks.

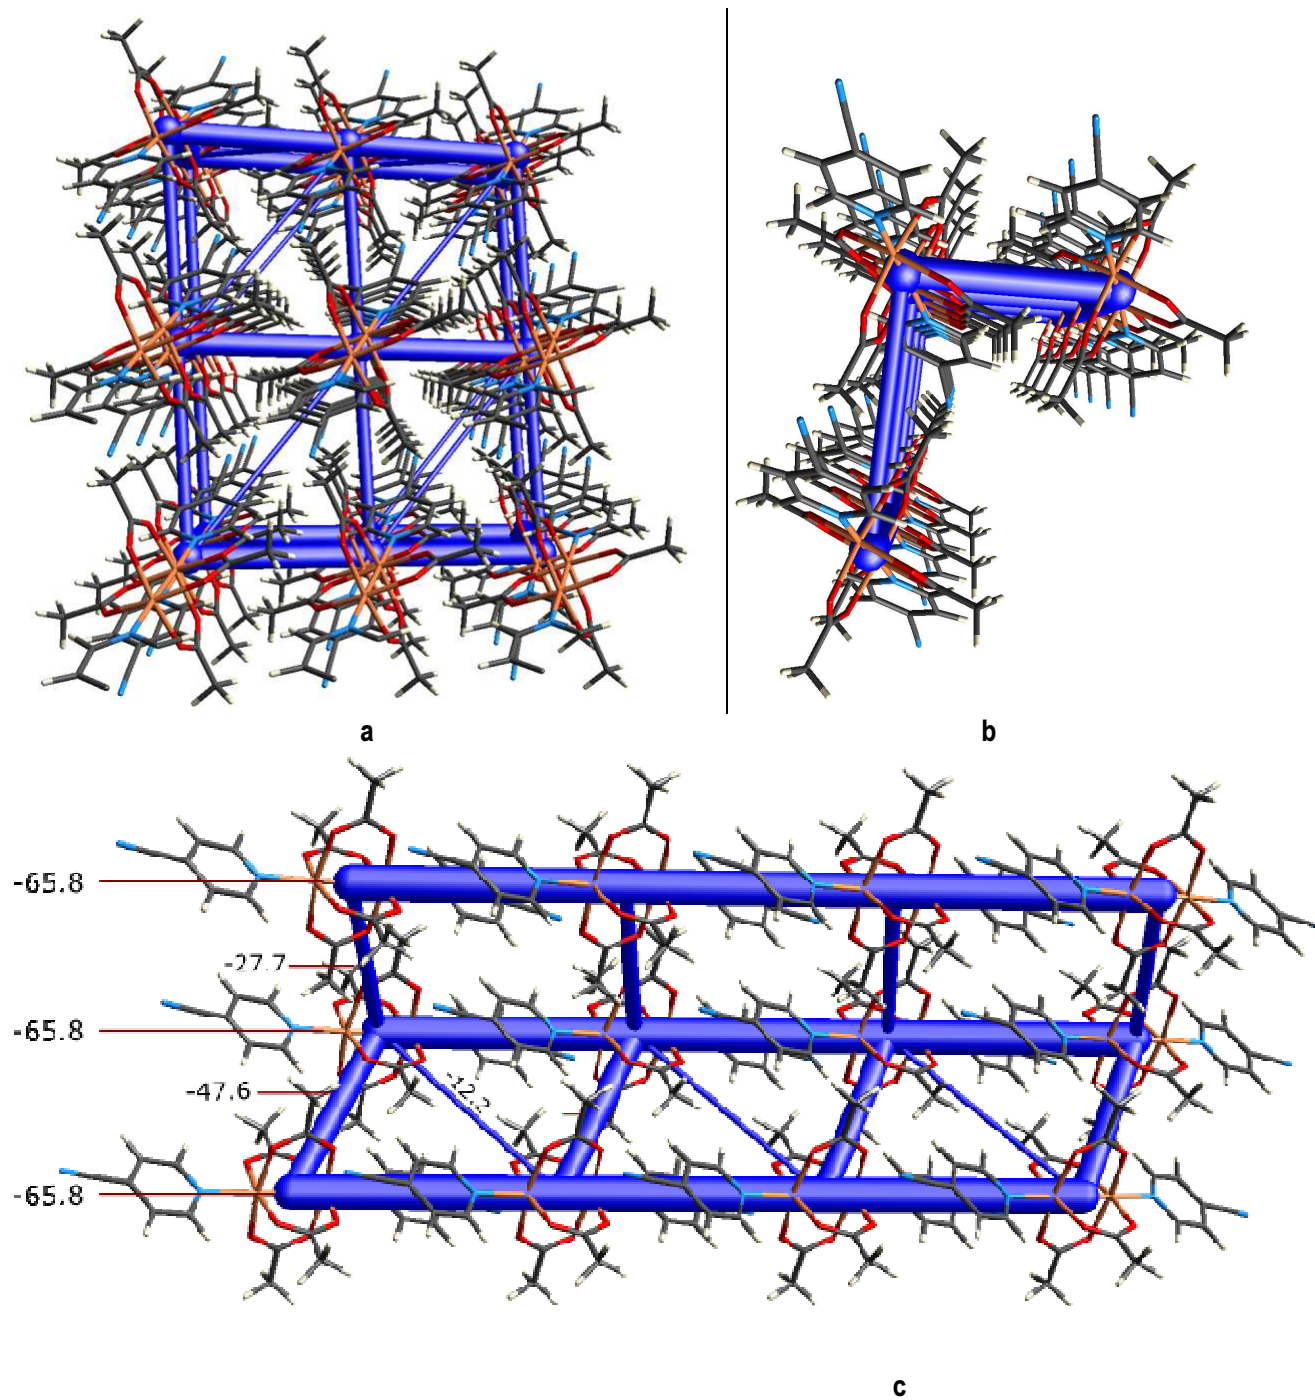

**Figure S6.** Showing (a) the energy framework of the native  $[\text{Cu}(\text{OAc})_2(4\text{CNpy})]_2$  crystal (notice the intersection of three planes) and its side projections (b) and (c). Cutoff 5 kJ/mol. Intermolecular interactions are given in kJ/mol.

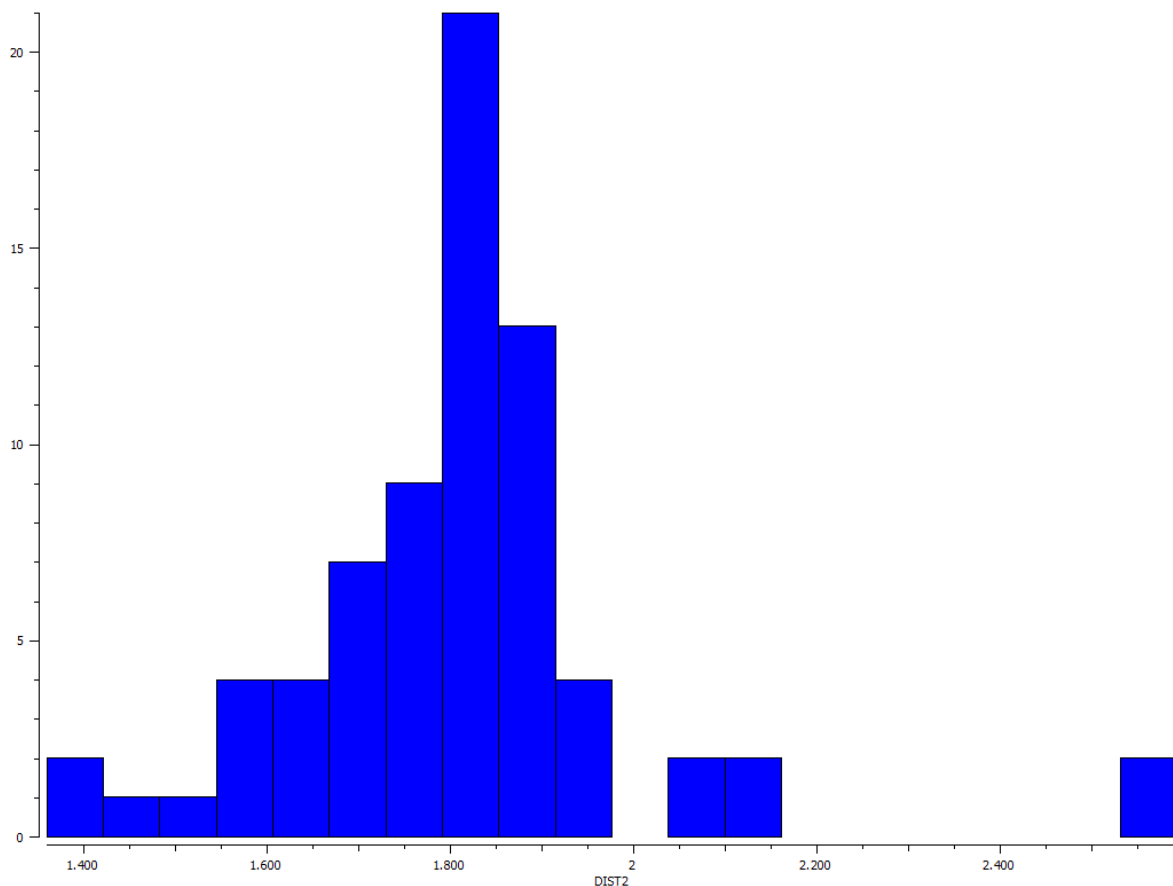

**Figure S7.** Distribution of O-H...O=C distance in AcOH dimers in the structures, deposited in CCDC CSD (Release 2020.0) [1].

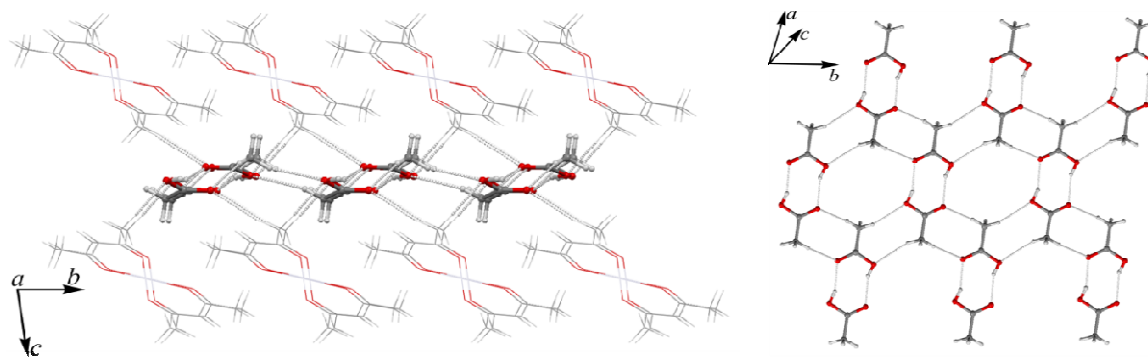

**a**

**Figure S8.** AA dimers shown in the fragments of the crystal packing of bis(acetylacetonato)-platinum(II) acetic acid solvate [2]. Packing pattern along the *a* axis (a) and packing pattern of the AA sublattice (b). Dotted lines shows H...O HBs at a distances shorter than sum of vdW radii. Bis(acetylacetonato)-platinum(II) are displayed in wireframe style for clarity.

<sup>1</sup>. Macrae, C. F., Sovago, I., Cottrell, S. J., Galek, P. T. A., McCabe, P., Pidcock, E., ... Wood, P. A. Mercury 4.0: from visualization to analysis, design and prediction. *J. Appl. Cryst.* **2020**, 53, 226–235

<sup>2</sup>. Kozitsyna, N. Y., Gekhman, A. E., Nefedov, S. E., Vargaftik, M. N., & Moiseev, I. I. A trinuclear platinum–cobalt acetate-bridged complex  $\{\text{Pt}^{\text{II}}(\text{acac})\}_2\text{Co}^{\text{II}}(\mu\text{-OOCMe})_4$ : Synthesis and structure., I.I., *Inorg. Chem. Commun.* **2007**, 10, 956

## References on the theoretical and experimental studies of AA supramolecular structure:

- J. L. Derissen, A Reinvestigation of the Molecular Structure of Acetic Acid Monomer and Dimer by Gas Electron Diffraction, *J. Mol. Struct.* **1971**, *7*, 67–80.
- Jones, R. E., & Templeton, D. H. The crystal structure of acetic acid. *Acta Crystallogr.* **1958**, *11*, 484
- Nahringbauer, I., Trabjerg, I., Ballhausen, C. J., Ragnarsson, U., Rasmussen, S. E., Sunde, E., & Sørensen, N. A. Hydrogen Bond Studies. 39. Reinvestigation of the Crystal Structure of Acetic Acid (at +5 degrees C and -190 degrees C). *Acta Chem. Scand.* **1970**, *24*, 453;
- Jönsson, P. G. Hydrogen bond studies. XLIV. Neutron diffraction study of acetic acid. *Acta Crystallogr., Sect. B.* **1971**, *27*, 893;
- Boese, R., Bläser, D., Latz, R., & Bäumen, A. 2,2,5,5-Tetramethylhex-3-yne at 281K., *Acta Crystallogr., Sect. C.* **1999**, *55*, 9900001.
- Allan, D. R., & Clark, S. J. Comparison of the high-pressure and low-temperature structures of ethanol and acetic acid., *Phys. Rev. B, Condens. Mat.* **1999**, *60*, 6328
- Dawson, A., Allan, D. R., Parsons, S., & Ruf, M. Use of a CCD diffractometer in crystal structure determinations at high pressure. *J. Appl. Crystallogr.* **2004**, *37*, 410
- Rovira, C., & Novoa, J. J. A density functional study of crystalline acetic acid and its proton transfer polymorphic forms. *J. Chem. Phys.*, **2000**, *20*, 9208; doi: 10.1063/1.1319699
- Zineb, N. B., Hammami, F., & Nasr, S. X-ray scattering study of liquid acetic acid: Is the short crystal structure reproduced in the liquid? *J. Mol. Struct.* **2010**, :1-3, 170-175.
- Gadermann, M., Vollmar, D., & Signorell, R.. Infrared spectroscopy of acetic acid and formic acid aerosols: pure and compound acid/ice particles.. *Phys. Chem. Chem. Phys.* **2007**, *32*, 4535.
- Betagnolli, H. The Structure of liquid Acetic Acid – An Interpretation of Neutro Diffractio Results by Geometrical Models, *Chem. Phys. Let.*, **1982**, *93*, 287–292.
- Heisler, A. Mazur, K. Yamaguchi, S. Tominaga, K. and S. R. Meech, Measuring acetic acid dimer modes by ultrafast time-domain Raman spectroscopy, *Phys. Chem. Chem. Phys.*, **2011**, *34*, 15573,.
- Imberti, S. and Bowron, D. T. Formic and acetic acid aggregation in the liquid state, *J. Phys.: Condensed Matter*, **2010**, *40*, 404212.
